# Supplementary material
Source: Springer Nature journal article supplement (https://www.springermedizin.de/resource/supplementary/13058_2010_2600_MOESM5_ESM.pdf/9701788)

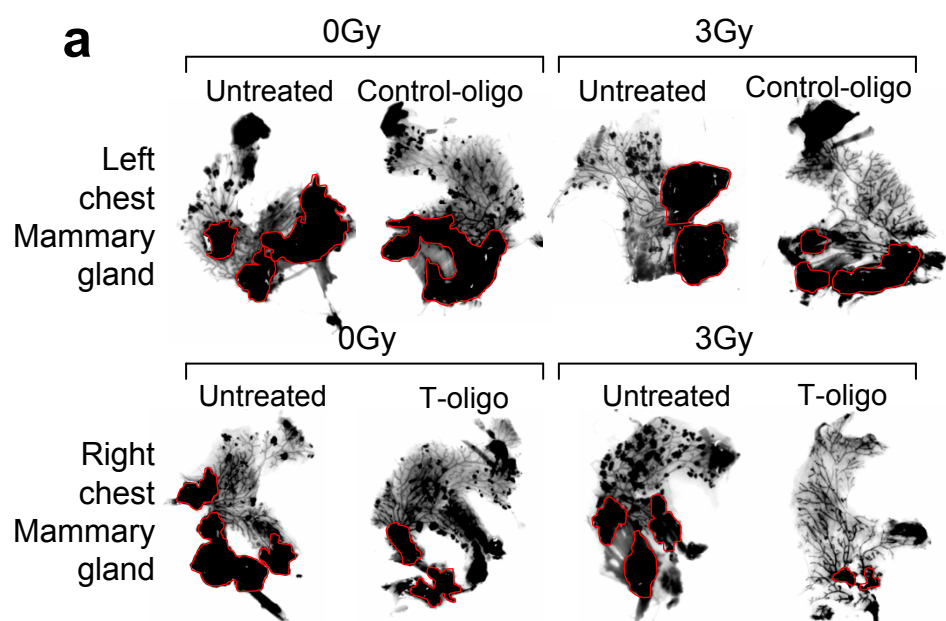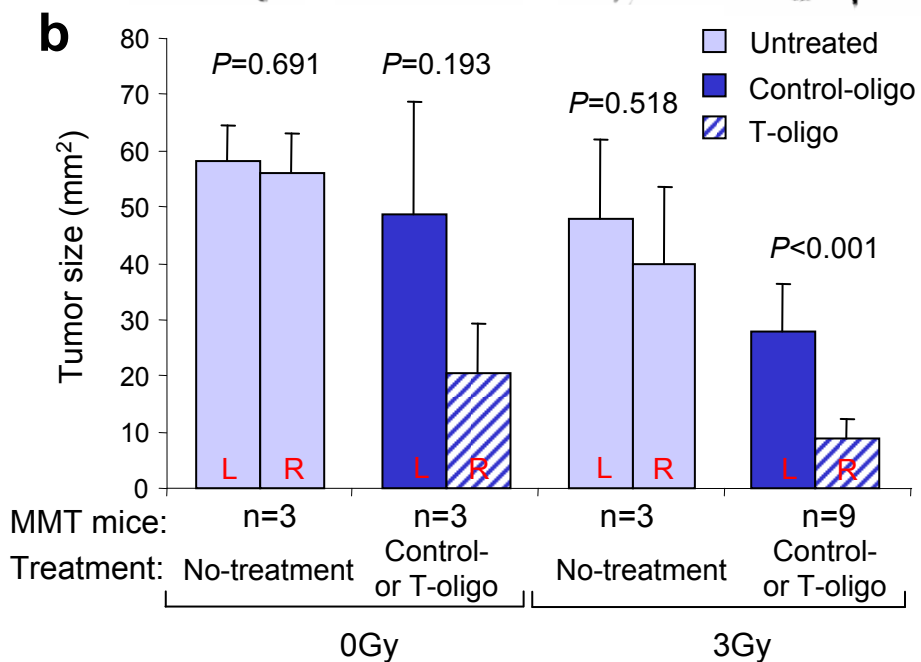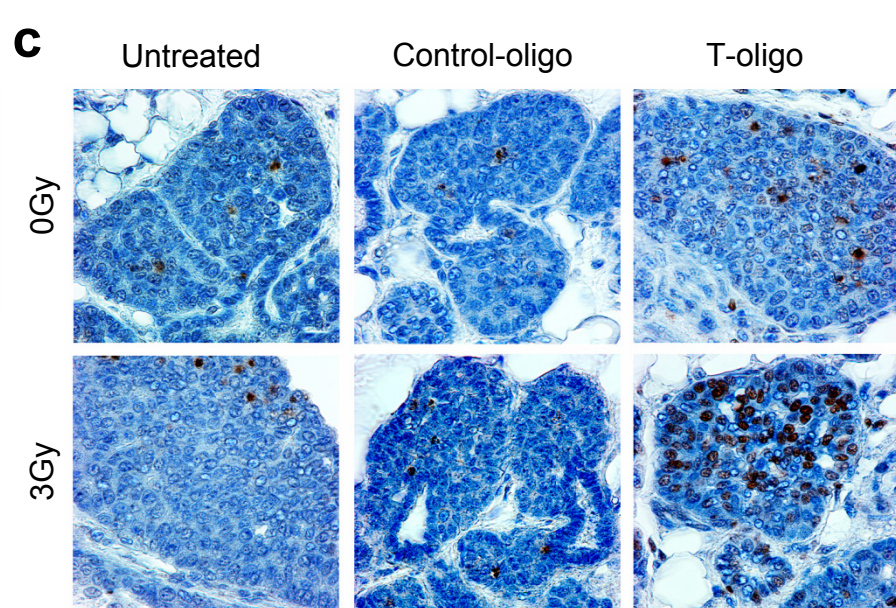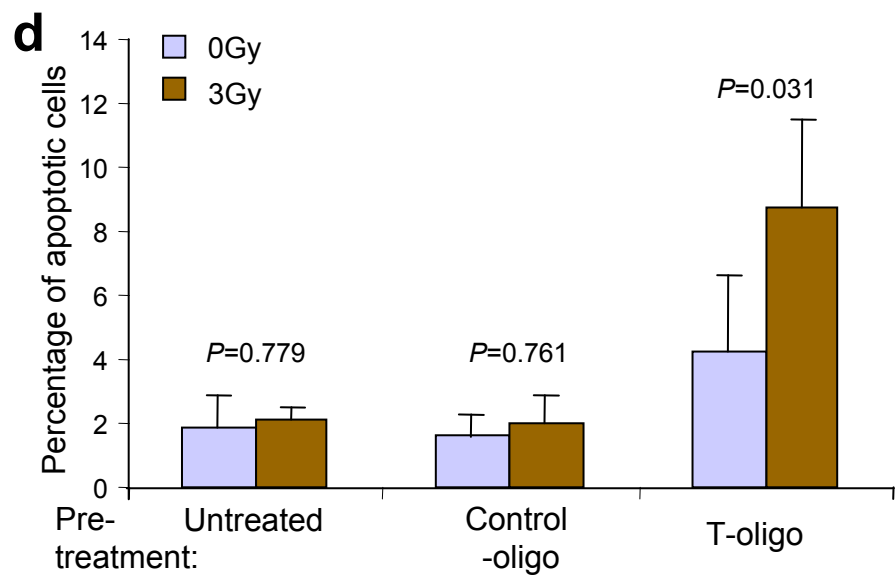

Supplement: MOESM5 [file 9701788]
